# Supplementary material for: Lactococcus lactis HkyuLL 10 suppresses colorectal tumourigenesis and restores gut microbiota through its generated alpha-mannosidase
Source: HighWire-hosted journal article supplement (doi:10.1136/gutjnl-2023-330835), 2024-04-10
Supplement: gutjnl-2023-330835supp003_data_supplement.pdf [file gutjnl-2023-330835supp003_data_supplement.pdf]

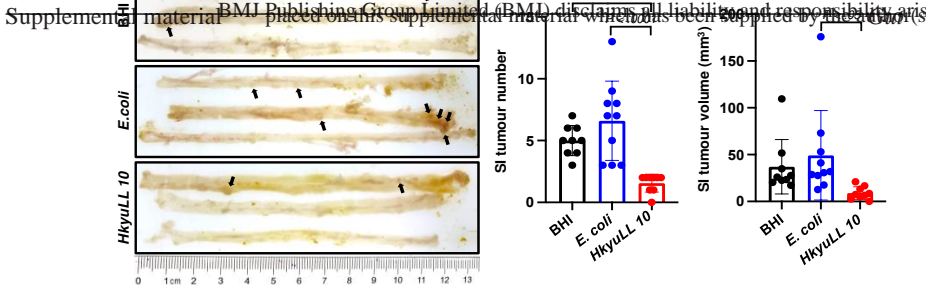

**Supplementary Figure 1. Tumour formation in the small intestine of *Apc*<sup>Min/+</sup> mice.** Small intestine morphology and tumour parameters, with black arrows indicating the visible tumours. SI, small intestine.
