# Supplementary material for: Lactococcus lactis HkyuLL 10 suppresses colorectal tumourigenesis and restores gut microbiota through its generated alpha-mannosidase
Source: HighWire-hosted journal article supplement (doi:10.1136/gutjnl-2023-330835), 2024-04-10
Supplement: gutjnl-2023-330835supp005_data_supplement.pdf [file gutjnl-2023-330835supp005_data_supplement.pdf]

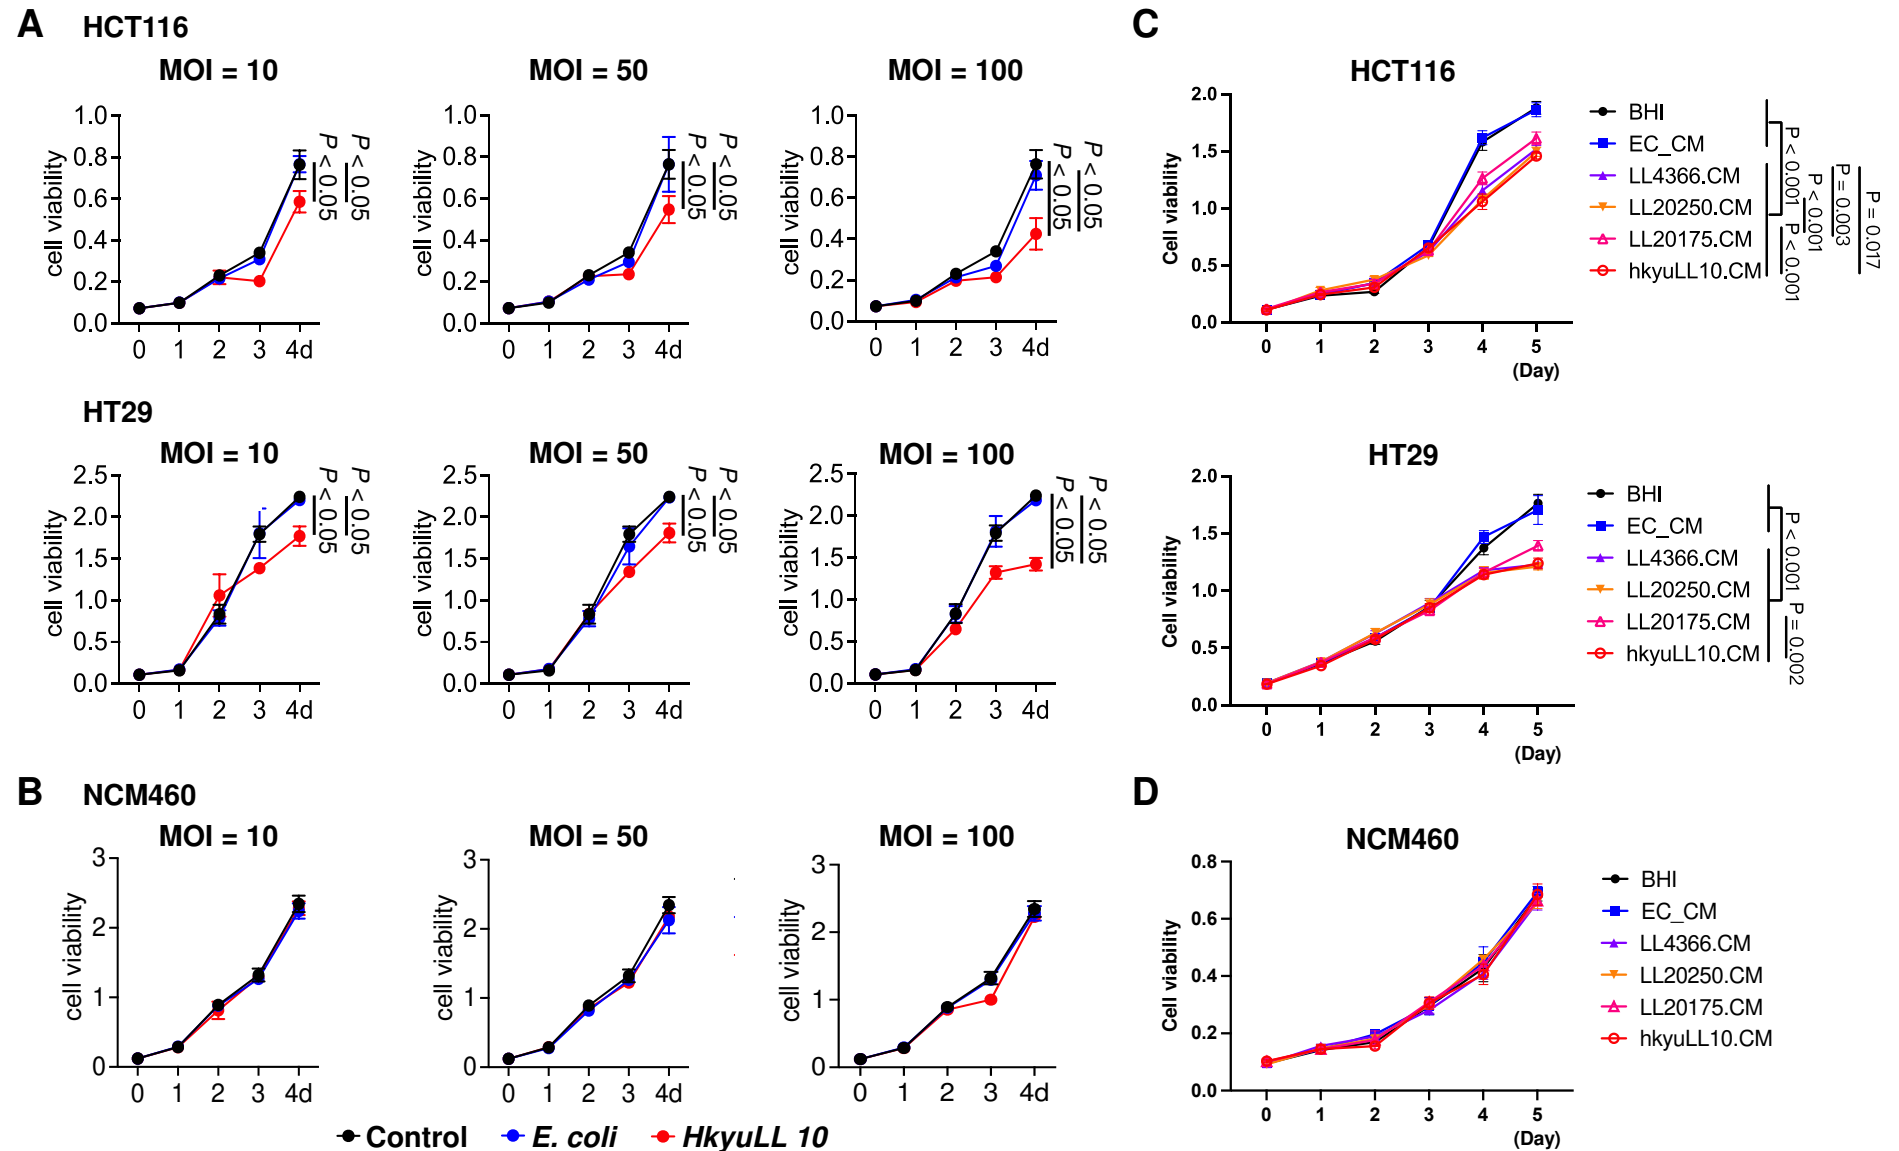

**Supplementary Figure 3. *L. lactis* inhibits growth of CRC cells. (A, B)** Cell viability at OD<sub>570</sub> of human CRC cells (HCT116, HT29) (A) and normal colon epithelial cells (NCM460) (B) under treatment of direct bacteria culture at different multiplicity of infection. (C, D) Cell viability at OD<sub>570</sub> of CRC cells (C) and normal cells (D) under treatment of 5% bacterial conditioned medium of different *L. lactis* strains. MOI, multiplicity of infection.
