# Supplementary material for: Lactococcus lactis HkyuLL 10 suppresses colorectal tumourigenesis and restores gut microbiota through its generated alpha-mannosidase
Source: HighWire-hosted journal article supplement (doi:10.1136/gutjnl-2023-330835), 2024-04-10
Supplement: gutjnl-2023-330835supp010_data_supplement.pdf [file gutjnl-2023-330835supp010_data_supplement.pdf]

**Supplementary Table 4. Sequence encoding  $\alpha$ -mannosidase in *HkyuLL 10* genome.**

|                            |                                                                                                                                                                                                                                                                                                                                                                                                                                                                                                                                                                                                                                                                                                                                                                                                                                                                                                                                                                                                                                                                                                                                                                                                                                                                                                                                                                                                                                                                                                                                                                                                                                                                                                                                                                                                                                                                                                                                                                                                                                                                                                                                                                                                                                                                                                                                                                                                                                                                                                                                                                                                      |
|----------------------------|------------------------------------------------------------------------------------------------------------------------------------------------------------------------------------------------------------------------------------------------------------------------------------------------------------------------------------------------------------------------------------------------------------------------------------------------------------------------------------------------------------------------------------------------------------------------------------------------------------------------------------------------------------------------------------------------------------------------------------------------------------------------------------------------------------------------------------------------------------------------------------------------------------------------------------------------------------------------------------------------------------------------------------------------------------------------------------------------------------------------------------------------------------------------------------------------------------------------------------------------------------------------------------------------------------------------------------------------------------------------------------------------------------------------------------------------------------------------------------------------------------------------------------------------------------------------------------------------------------------------------------------------------------------------------------------------------------------------------------------------------------------------------------------------------------------------------------------------------------------------------------------------------------------------------------------------------------------------------------------------------------------------------------------------------------------------------------------------------------------------------------------------------------------------------------------------------------------------------------------------------------------------------------------------------------------------------------------------------------------------------------------------------------------------------------------------------------------------------------------------------------------------------------------------------------------------------------------------------|
| <b>Encoding sequence</b>   | atgaaaaagaaaacgggtacatatcatctcacagtcattgggacgcagaatggtatatggcttatgaagaacatcatatgcgtttagcaatfta<br>gtggatgattactgatttattcaagaagatcctgagttgtagctttcatttggatggacaacgattatttttagatgactatttgcagctacgctc<br>ctgagcgtctgaggagtagacaagcagcgggttcagctggaaaattgaaaattggccattttatatcttacaagatgattcctcattagttctga<br>atcaaacgttcgtaatatgcttgttggcgtaaagaatcggagcgttgggggctccagttgagttgggtatttccctgatacttttggaaat<br>gggccaacgccacaatgatgaaagcggcaggacttagcctgcagcttttggctgagggagtgaaaccaatcgggttgataatcaagttt<br>ggaacaatcagaggaagcctacagttcacaatttcagaaatgtggggggaagtcctgatgggacaaaaattcttgaattctatttccaatt<br>ggtattcaaatgaaatgaaatcctgctgaaaaagcagcagcactgaaatgggaatcaaaaattagcagatgtgaaaaattgcttcacat<br>cacatcttaaatgatgaatggcgtgagatcaaccagttcagaaaagttgagcaaaagcattcgttggcaaatgaaatcttccagattatg<br>agtttcttacttaattggccaactatttgaagctgtaaggtcagatttggaaaacttatctacgtaaacaggggactaacctcacagga<br>aacgatgctgtgtacactttagcaaatcagcgttcgagtgagttatctcaacaatggaatacaaaagttgagcagttgaaaattgta<br>cagaacctctcgcagtttagcttatcgggtgacaggagagatccgcagcaaaatgactatgcttggaaaactttgatgcaaaaatcca<br>catgatagatctgtgttctctgtgacgaagtctcgtgaaatgatgacagctttgaaaaagcgaatgaagtagggaaatattctctgat<br>gatgactatttgaactcgtaaagcttacttgaagcacaatccttttgcgttttaatacagctggacattcaaaacagtgaggctga<br>agttgaagtagttctttagcgaatattttaaagaaagaaatcctgaaaaactttatgatgaaatgaaagcagacccaaggaactataaag<br>taatcaatcgtgaaagcgaaggtccagctgaaatcagtgaaagaagttttatttgattatgattaccgaaagatcgttccgagttcctta<br>catgaaacgatttggaaagtgaaatattttaaagaaatgagtgcttttctgggaaagtttgatttggactactgacgatgacagcttt<br>gataatgcttctgacgtaataatgaaagtagatttctgtcaacaatgaaaatgaaagttgaaactgacagtttaataatgaaatgaa<br>gtattttgataagtcgctcaataaagttttaaagatttctgtcttgaagacactggtgataattggaatgaaatataatctattccaactaaaat<br>accaaaagcaatttttctactgacagctctgtaatttcaattactgacagcagcaaaatgagggaagttcagcttaacaagtgctgatg<br>tcctgaatctgctgacgaatattgtagaggaacaaaaaggtttggaattccgtatcgaatgctgctgctgataacttttgcctttag<br>aggtacaagcaaatcactgtacgtaaaaattcaaaaaagttgatttgaaacagcattgataatcaaatgaaagatcagacactcgtgta<br>ctatccagcgggattaacaagcgaatcacgaagctgacagatatttgaagtagtgacaagacctaattgatgctgaaactgggaaa<br>atccaacaatccacagatcagcaagcttctgtaatttcacaatgaaataggtttaaactgttgtaattttgtttaaataatgaaatgaa<br>ctgacagcgaatattccctaacttacttagaggagttgagaactggtgattggggtacttccaacaccagagcgtcaaaccttagga<br>ctgcatacttttaactatagtttagaatttcatgaccggcttacgaacgttatgaaactatcaacatgcttatgttgcacaagttccatttcaacg<br>gtagaactgacaaatccgtagcagcaaaaaacttaccgtcagctgggagaatattgaaatgatactgataaattgctatcacggcattgaa<br>acgtcgcgaatcagataatgcttagttttagaggctacaatattcctccgactttgtga |
| <b>Amino acid sequence</b> | MKKKTVHIISHSHWDREWYMA YEEHMLRVNLVDDLLDLFKKDPEFDSFHLDGQTIILD<br>DYLQVRPERREEVQAAVSAGKLIKGFYILQDDFLISSESNVRNMLVGRKESERWVGAPVE<br>LGYFPDTFGNMGQTPQMMKAAAGLSAAAFGRGVKPIGFDNQVLEQSEEA YSSQFSEMWW<br>EGPDGTKILGILFANWYSNGNEIPAEEKAAALEFWNQKLADVEKFASTSHLLMMNGVDH<br>QPVQKDLSKAIRLANELFPDYEFVHSNWPTYLEAVRSDLFENLSTVTGELTSQETDQWYT<br>LANTASSRVYLKQWNTKVERQLENVTEPLASLAYRVTGEYPHDKLTYAWKTLMQNHP<br>HDSICGCSVDEVHREMMTRFEKANEVGKYLADDALFELAKVIDFEGQHPFVVFNTAGHS<br>KTGEAEVEVVLERKLFKEGIPEKLYDELKAQPKATYKVINREGQEVPAEISEEEVLFYD<br>LPKDRFRVPYMKRFVKVFLNEMSAFWSWESFDLVLTDADSFDNSSVSNNESMISGQTI<br>ENESLKLTVNHNGTSLIFDKSLNKVFKDLLVFEDTGDIGNEYIYFQPKNTKAIFSTDSPVEF<br>SIITDRAEIAEVQLKQVLMIPESADELLEDEQKQVLEFRYRNAGRSDKLLPLEVTSKITVR<br>KNSKKVDFETSIDNQMKDHLRLVLPAGLTSNHEADSIYEVVTRPNVMPETWENPTNP<br>QHQQAFVNLHNEEYGLTVGNFGLNEYEITDSANIALTLRGGVGLDQWGYFPTPEAQLT<br>GRHTFNYSLEFHGPAYERYETYQHAYVAQVPFSTVELTNPSAEKTLPSAGRILEIDTKFA<br>ITALKRRESNGLVLRGYNMXSGLC                                                                                                                                                                                                                                                                                                                                                                                                                                                                                                                                                                                                                                                                                                                                                                                                                                                                                                                                                                                                                                                                                                                                                                                                                                                                                                                                                                                                                                                                                                                                                                                                                                                        |
